# Supplementary material for: Morphology-dominant microwave absorption enhancement and electron tomography characterization of CoO self-assembly 3D nano-flowers
Source: Royal Society of Chemistry journal article supplement (doi:10.1039/c4tc00739e), 2014-01-01
Supplement: c4tc00739e1.pdf [file c4tc00739e1.pdf]

## Supporting Information

### Morphology-dominant microwave absorption enhancement found from nano-flower CoO self-assembly nanostructures

Ying Li<sup>a</sup>, Jie Zhang<sup>a</sup>, Zhengwang Liu<sup>a</sup>, Mengmei Liu<sup>a</sup>, Hongji Lin<sup>b</sup>, Renchao Che<sup>a\*</sup>

<sup>a</sup> *Department of Materials Science and Advanced Materials Laboratory, Fudan University, Shanghai 200438, P. R. China.*

<sup>b</sup> *Navy Equipment Technology Institute, Beijing Postbox 1481, 102442*

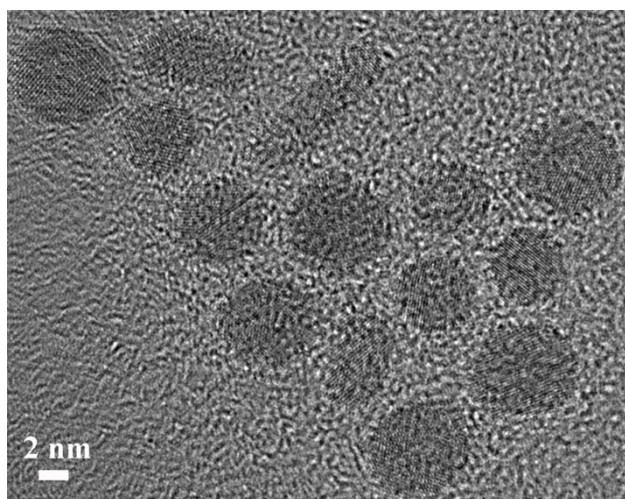

**Fig. S1** TEM image of sphere CoO nanocrystals.

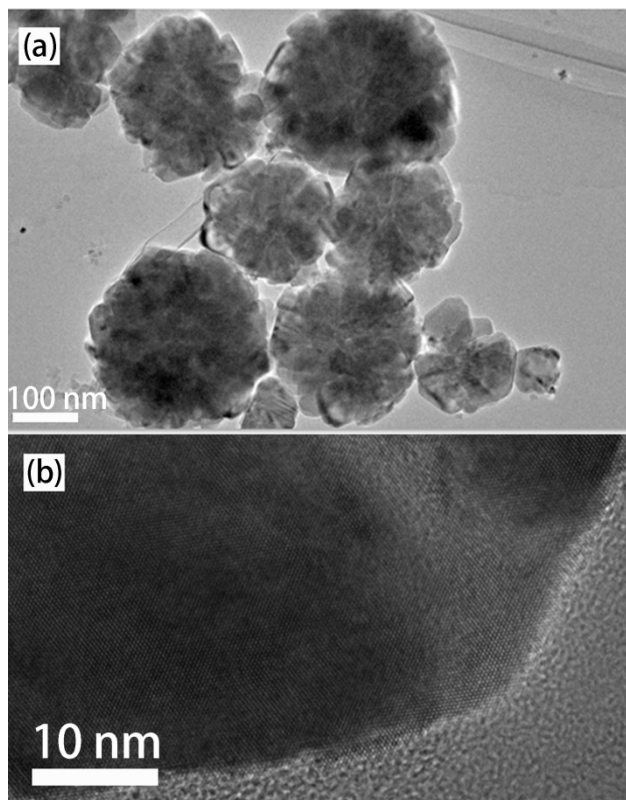

**Fig. S2** TEM images of hexagonal CoO nanocrystals: (a) TEM image, (b) HRTEM image.

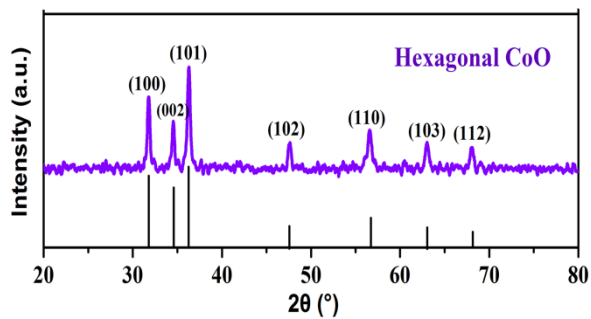

**Fig. S3** XRD pattern of the as-prepared hexagonal CoO NCs.

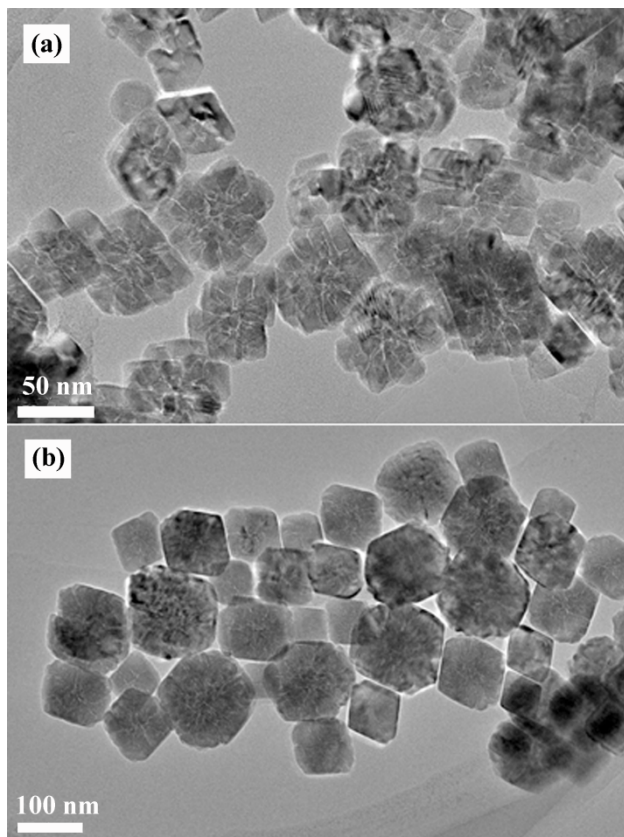

**Fig. S4** TEM images of CoO nanocrystals prepared with different  $\text{Co}(\text{acac})_3$  precursor: (a) 0.2 mmol, (b) 1.0 mmol.

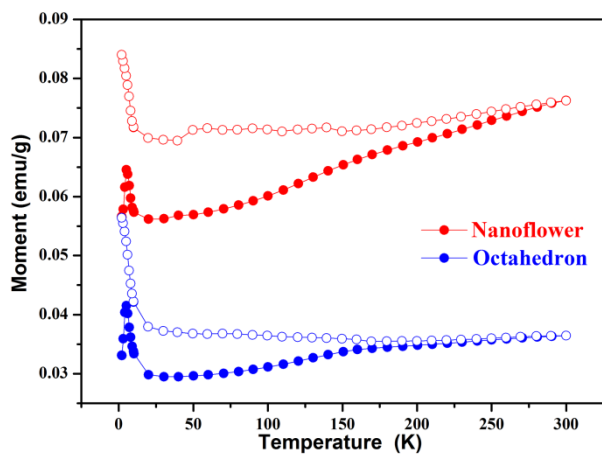

**Fig. S5** ZFC (filled symbols) and FC (open symbols) magnetization curves for 3D self-assembly nano-flower (red line) and octahedron (blue line) of cubic CoO NCs.

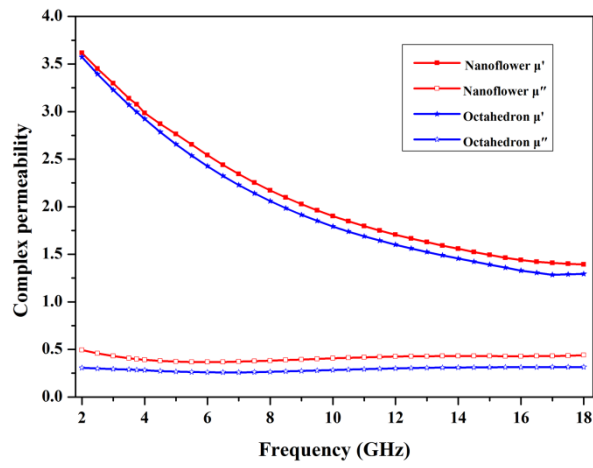

**Fig. S6** Frequency dependence of real and imaginary parts of complex permeability of the nano-flower and nano-octahedron CoO NCs/EP composites.

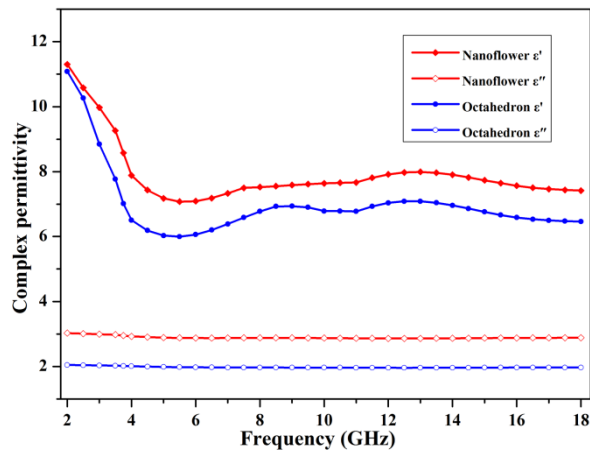

**Fig. S7** Frequency dependence of real and imaginary parts of complex permittivity of the nano-flower and nano-octahedron CoO NCs/EP composites.
